# Supplementary material
Source: PubMed Central journal article supplement (PMC5849478)
Supplement: NIHMS908800-supplement-Supp_info.pdf [file NIHMS908800-supplement-Supp_info.pdf]

## **Fig S1**

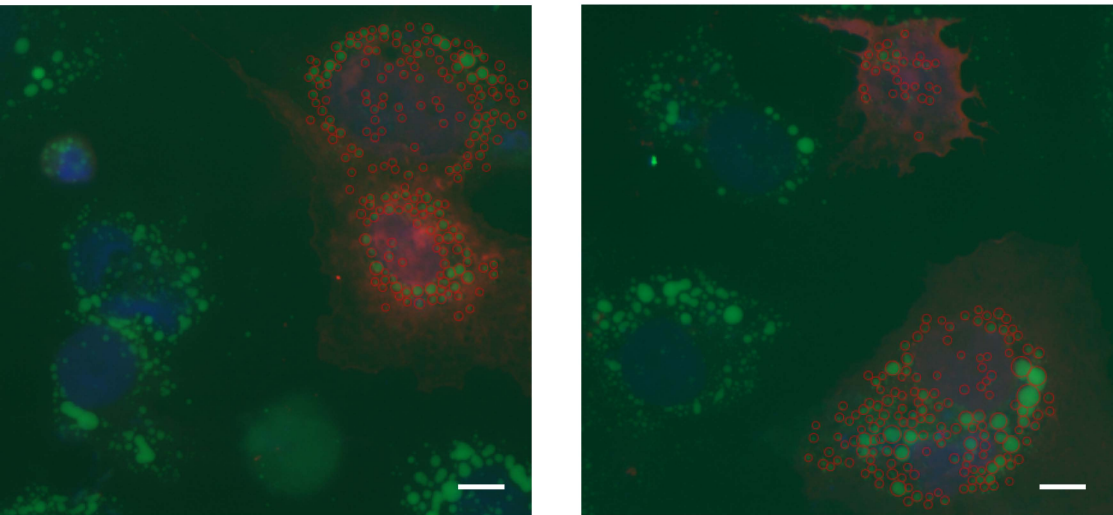

**Fig. S1.** Quantitation of lipid droplets in oleic acid-treated Huh7 cells. Lipid droplets were stained with BODIPY 493/503 and imaged as described in Materials and Methods. Lipid droplet accumulation was quantitated by drawing a circle around each droplet using the Zeiss Zen 2.3 lite software package to measure the diameter and area; two such images with circled lipid droplets are shown. Scale bar, 10  $\mu\text{m}$ .

## Fig S2

A

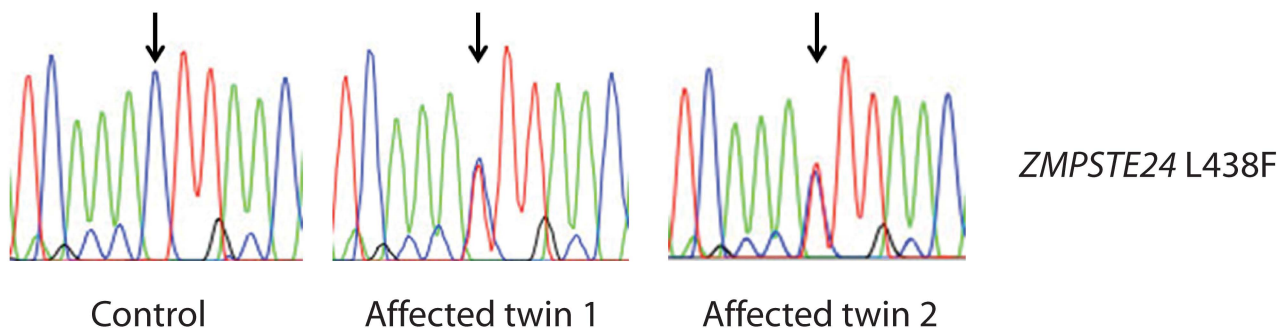

B

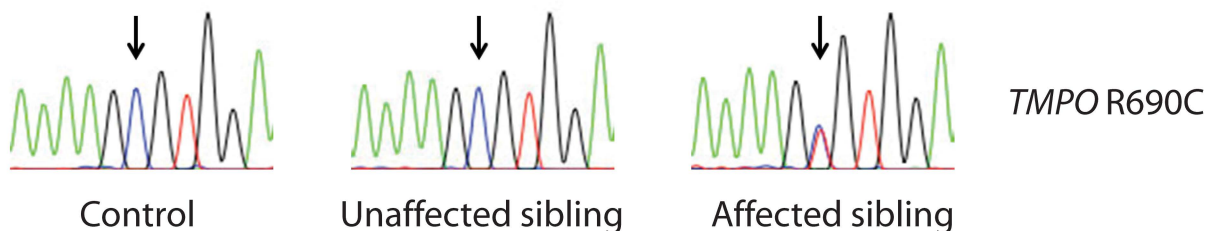

C

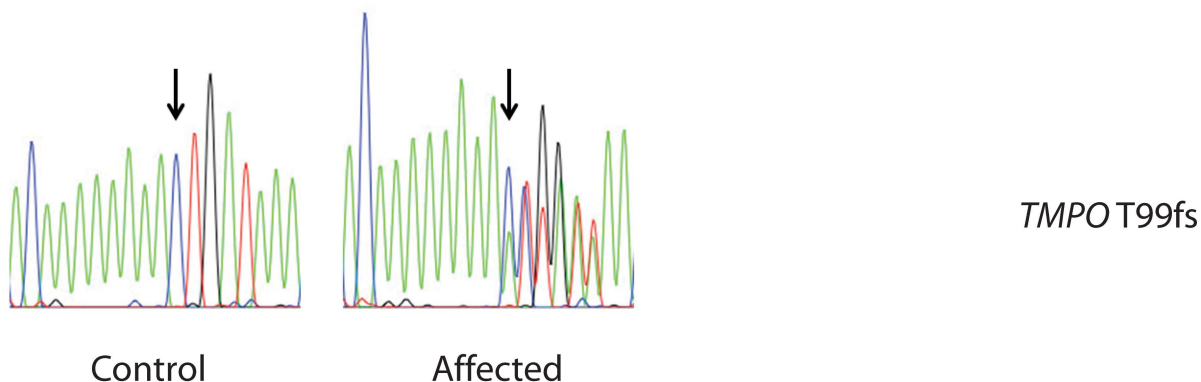

**Fig. S2.** Selected chromatograms showing confirmation of lamina-related variants in individuals with NAFLD. (A) Two twins with NAFLD carrying the L438F variant in the gene encoding the ZMPSTE24 protease, which cleaves lamin A (C > T change in genomic DNA). (B) NAFLD patient with C > T change in *TMPO* (which encodes the six isoforms of LAP2), resulting in the LAP2 $\alpha$  R690C variant. An unrelated control and the patient's unaffected sibling are shown for comparison. (C) NAFLD patient with single base-pair insertion in *TMPO* resulting in a frameshift (fs) and premature stop codon after Thr 99 in the LAP2 protein. Arrows indicate the changed nucleotide in each case; all variants were confirmed by Sanger sequencing of both sense and antisense strands.

**Fig S3**

**A**

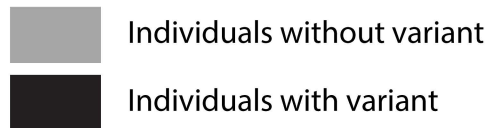

All variants with MAF < 0.06

Insertion/deletion/  
conserved residue variants

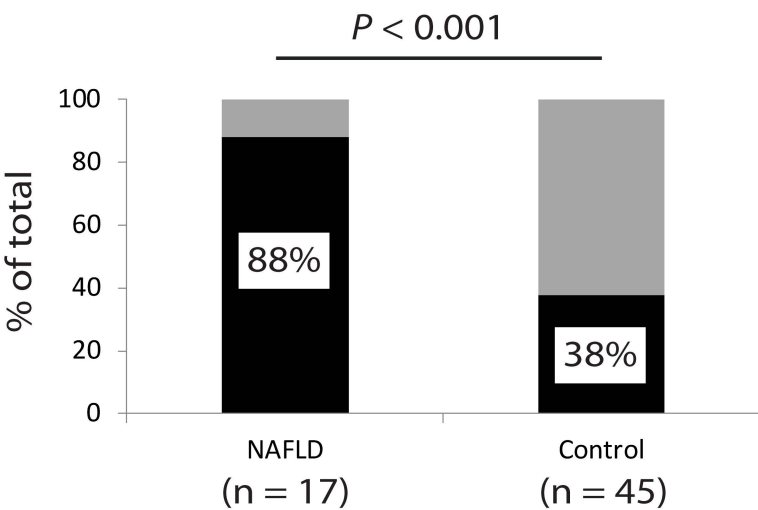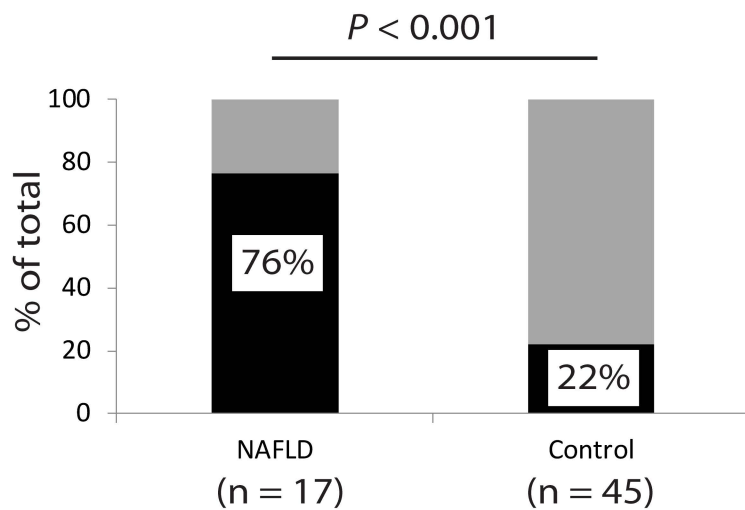

**B**

All variants with MAF < 0.06

Insertion/deletion/  
conserved residue variants

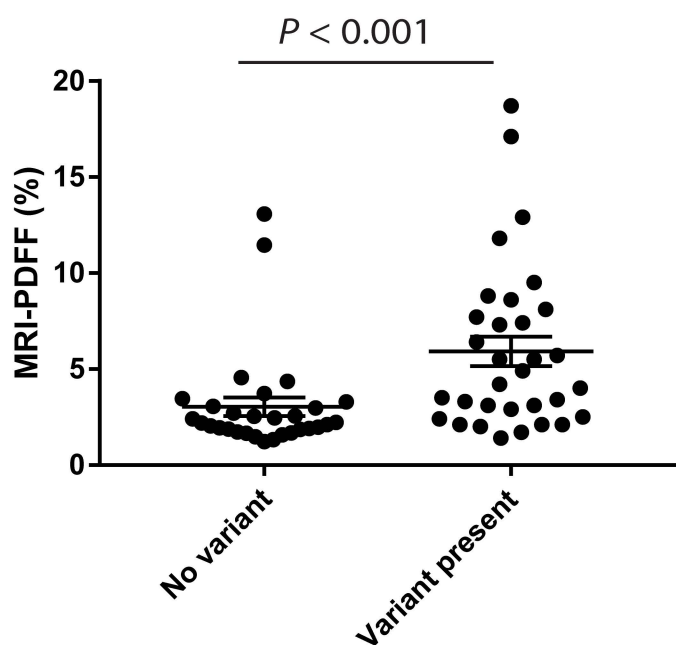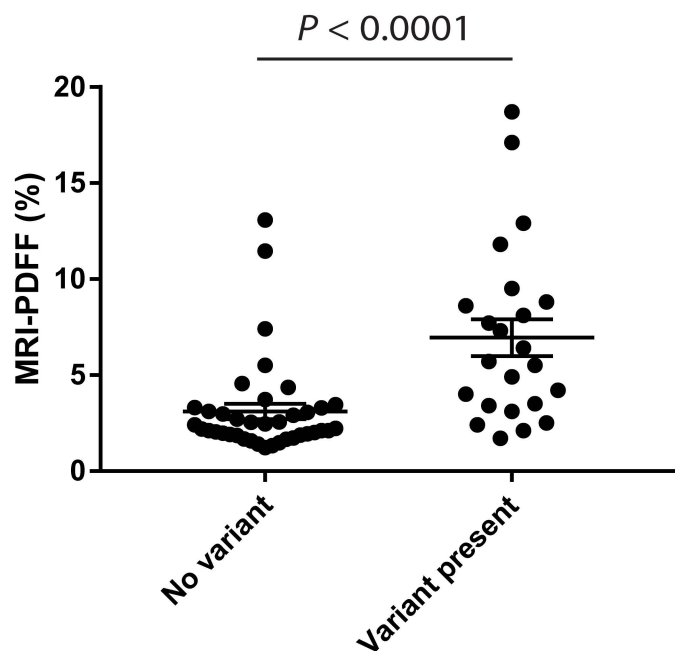

**Fig. S3.** Among twin pairs only (31 pairs, n=62 subjects), variants in lamina-related genes were predominantly found in twins with NAFLD. (A) *Left panel:* Percentages of twins (y-axis) with and without genetic variants are shown for NAFLD cases and Controls (includes all coding variants with minor allele frequency < 0.06). *Right panel:* Percentages of twins (y-axis) with and without a variant resulting in insertion/deletion or change in a conserved residue are shown for NAFLD cases and Controls. Fisher's exact test was used to assess statistical significance at a threshold of  $P < 0.05$ . (B) *Left panel:* Scatter plot of liver fat content (assessed by MRI-PDFF) of twins (31 pairs, n=62 subjects) without and with a lamina-related genetic variant (includes all coding variants with minor allele frequency < 0.06). *Right panel:* Scatter plot of liver fat content (assessed by MRI-PDFF) of twins without and with a lamina-related genetic variant (includes variants resulting in insertion/deletion or change in a conserved residue). Error bars represent standard error of the mean; Mann-Whitney U test was used to assess statistical significance at a threshold of  $P < 0.05$ .

**Fig S4**

**A**

Monozygotic twins

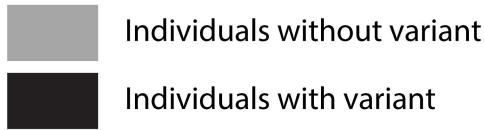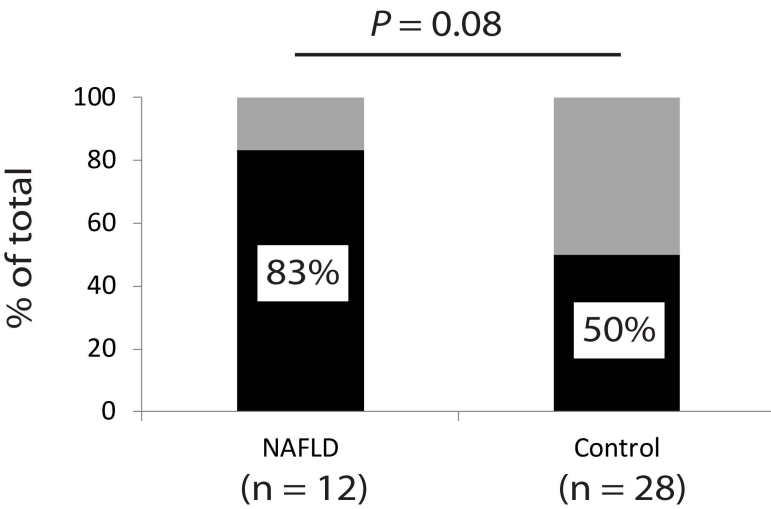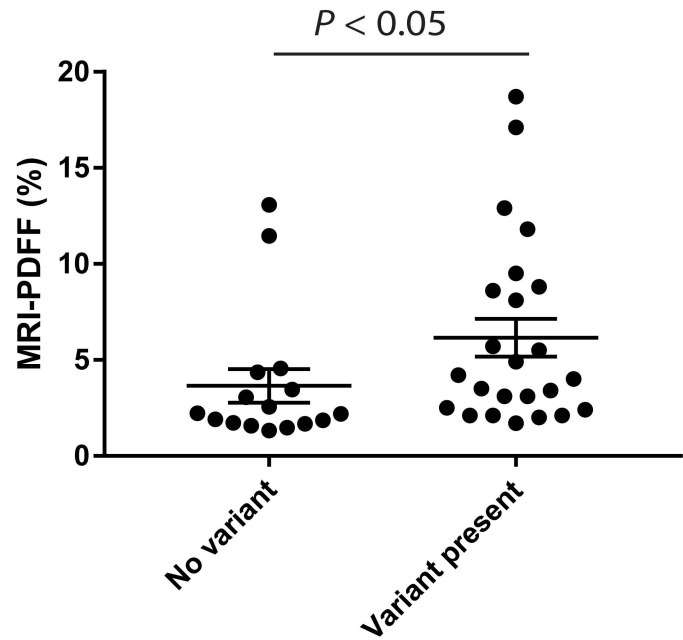

**B**

Dizygotic twins

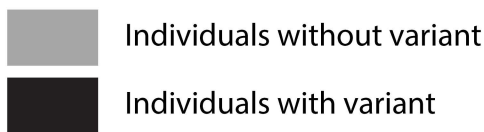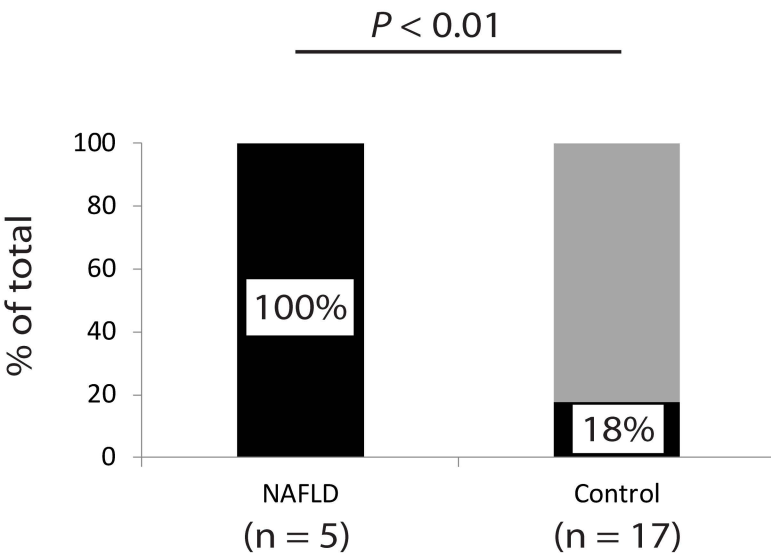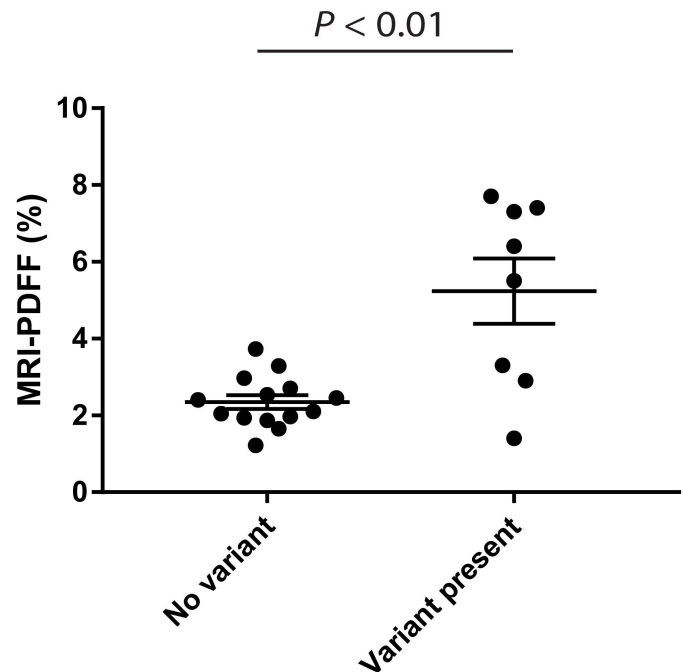

**Fig. S4.** Among both monozygotic (A) and dizygotic twins (B), variants in lamina-related genes were predominantly found in twins with NAFLD. (A) Monozygotic twin pairs (20 pairs, n=40 subjects). *Left panel:* Percentages of monozygotic twins (y-axis) with and without genetic variant(s) are shown for both NAFLD cases (n=12) and Controls (n=28) (includes all coding variants with minor allele frequency < 0.06). Fisher's exact test was used to assess statistical significance at a threshold of  $P < 0.05$ . *Right panel:* Scatter plot of liver fat content (assessed by MRI-PDFF) of monozygotic twins without (n=16) and with (n=24) a lamina-related genetic variant (includes all coding variants with minor allele frequency < 0.06). Error bars represent standard error of the mean; Mann-Whitney U test was used to assess statistical significance at a threshold of  $P < 0.05$ . (B) Dizygotic twin pairs (11 pairs, n=22 subjects). *Left panel:* Percentages of twins (y-axis) with and without genetic variant(s) are shown for both NAFLD cases (n=5) and Controls (n=17) (includes all coding variants with minor allele frequency < 0.06). Fisher's exact test was used to assess statistical significance at a threshold of  $P < 0.05$ . *Right panel:* Scatter plot of liver fat content (assessed by MRI-PDFF) of twins without (n=14) and with (n=8) a lamina-related genetic variant (includes all coding variants with minor allele frequency < 0.06). Error bars represent standard error of the mean; Mann-Whitney U test was used to assess statistical significance at a threshold of  $P < 0.05$ .

**Fig S5**

**A**

Variants with minor allele frequency < 0.06

\*  $P = 0.02$

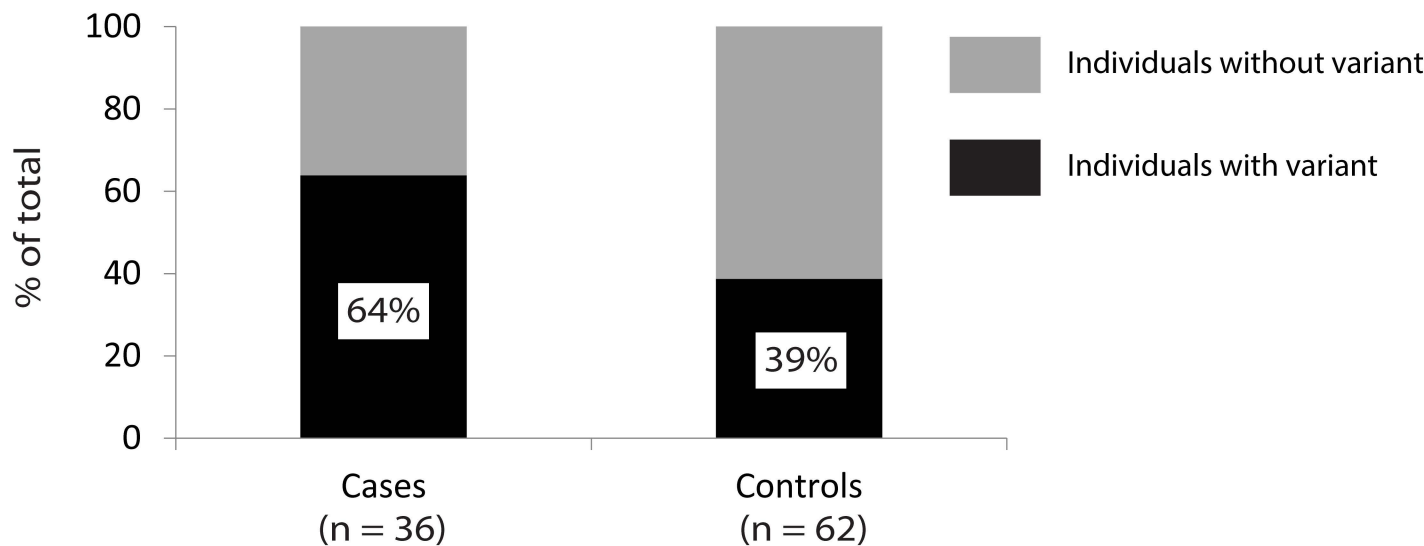

**B**

Insertion/deletion/conserved residue variants

\*\*  $P < 0.01$

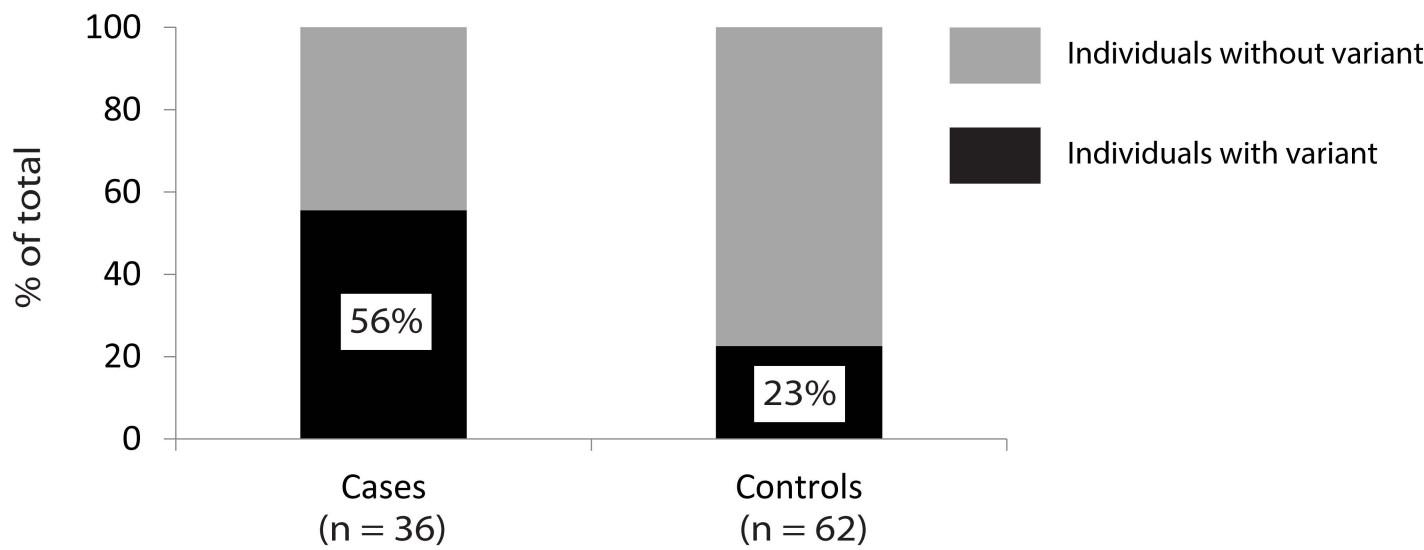

**Fig. S5.** Among all subjects (n=98), including both twin/sibling pairs (n=74) and additional subjects not part of a twin/sibling pair (n=24), variants in lamina-related genes were predominantly found in individuals with NAFLD. (A) Percentages of individuals (y-axis) with and without genetic variant(s) are shown for both NAFLD cases (n=36) and controls (n=62) (includes all coding variants with minor allele frequency < 0.06). (B) Percentages of individuals (y-axis) with and without a variant resulting in insertion/deletion or change in a conserved residue are shown for NAFLD cases (n=36) and controls (n=62). Fisher's exact test was used to assess statistical significance at a threshold of  $P < 0.05$ .



**Fig S6**

**A**

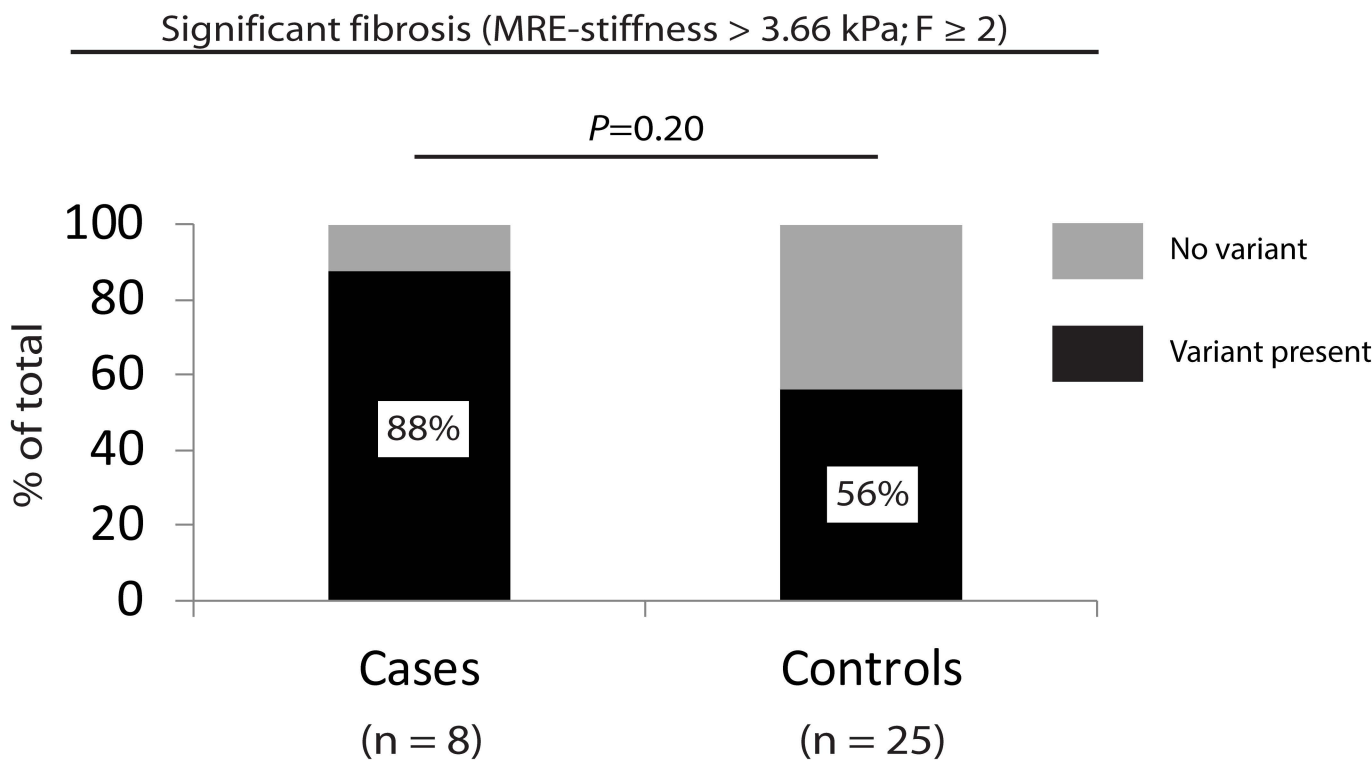

**B**

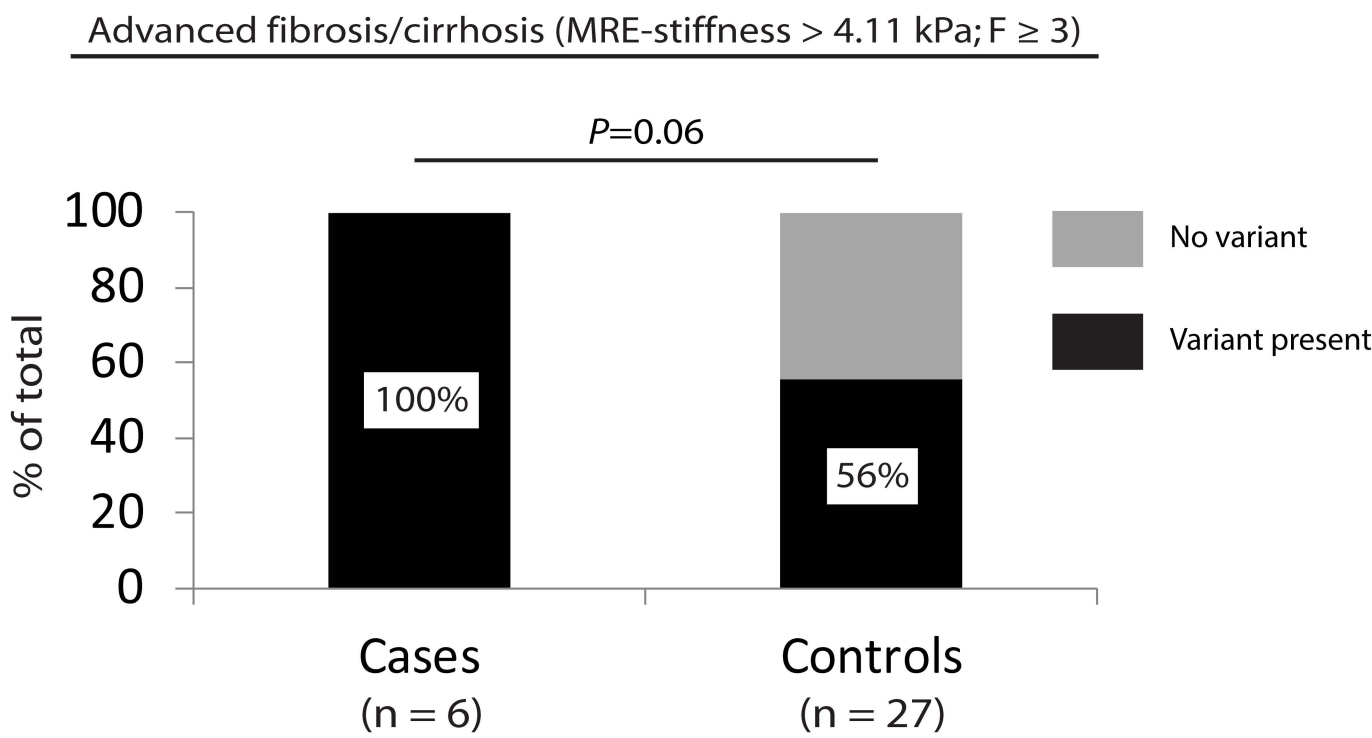

**Fig. S6.** Lamina-related variants among study participants with NAFLD and hepatic fibrosis. (A) Significant fibrosis: Percentages of individuals (y-axis) with and without genetic variant(s) are shown for both Cases (NAFLD with MRE > 3.66 kPa;  $F \geq 2$ ) and Controls (NAFLD with MRE < 3.66 kPa;  $F < 2$ ). (B) Advanced fibrosis/cirrhosis: Percentages of individuals (y-axis) with and without genetic variant(s) are shown for both cases (NAFLD with MRE > 4.11 kPa;  $F \geq 3$ ) and controls (NAFLD with MRE < 4.11 kPa;  $F < 3$ ). For each group, Fisher's exact test was used to assess statistical significance at a threshold of  $P < 0.05$ . Note that this analysis includes twins and siblings with NAFLD (n=20 twins/siblings with NAFLD and MRE data) as well as additional subjects with NAFLD who were not part of a twin/sibling pair (n=13 subjects with NAFLD and MRE data); n=33 total subjects.

**Fig S7**

**A**

All twin and sibling pairs

PNPLA3 CC genotype (n=40)

PNPLA3 CG/GG genotype (n=34)

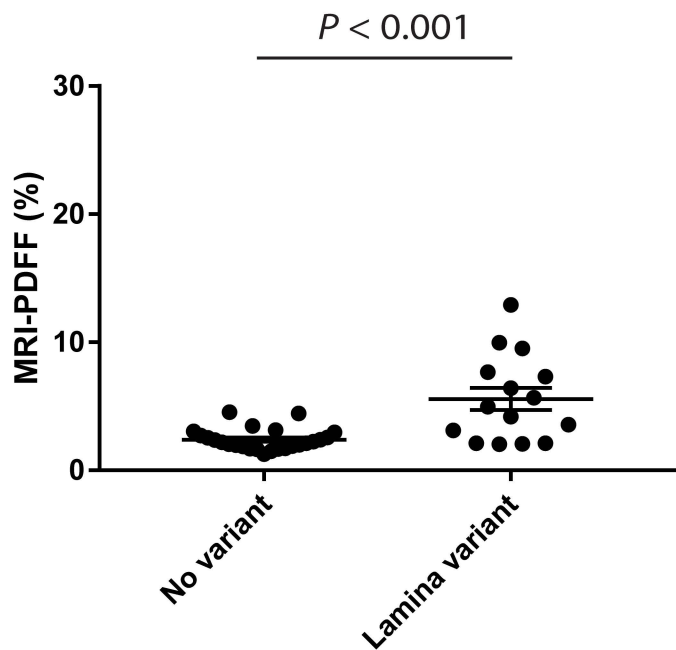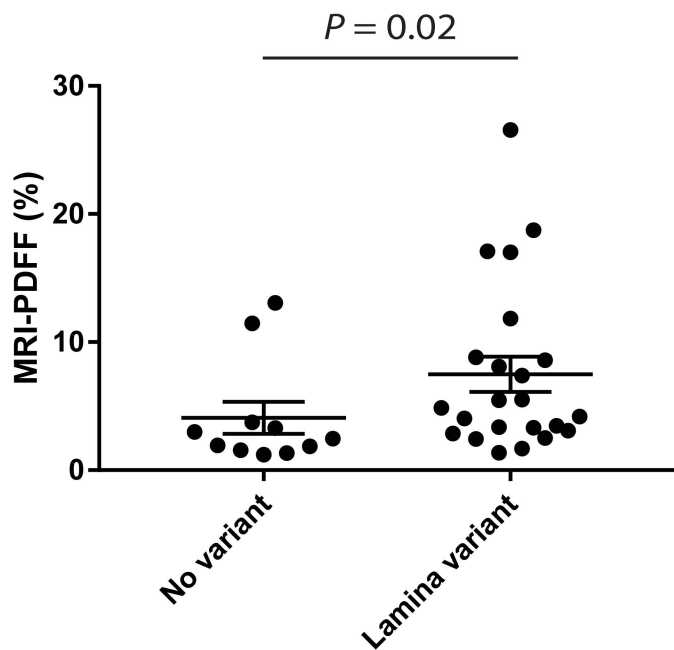

**B**

Twin pairs only

PNPLA3 CC genotype (n=31)

PNPLA3 CG/GG genotype (n=31)

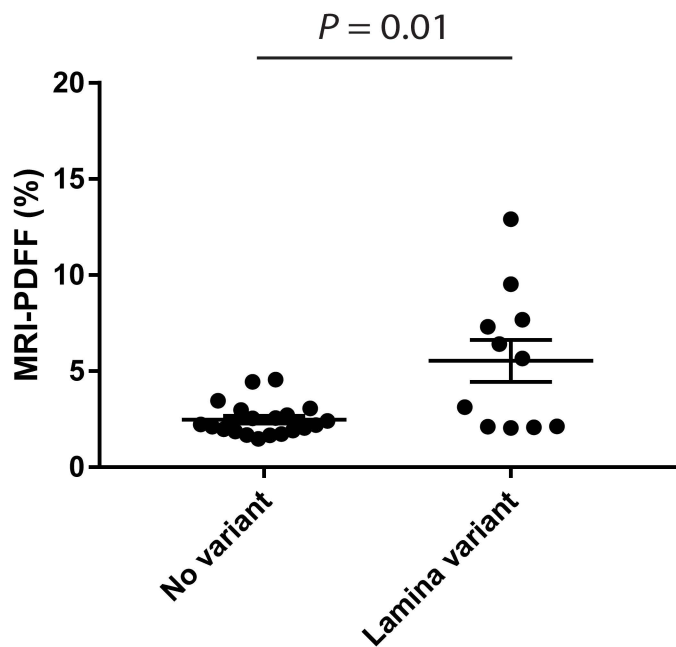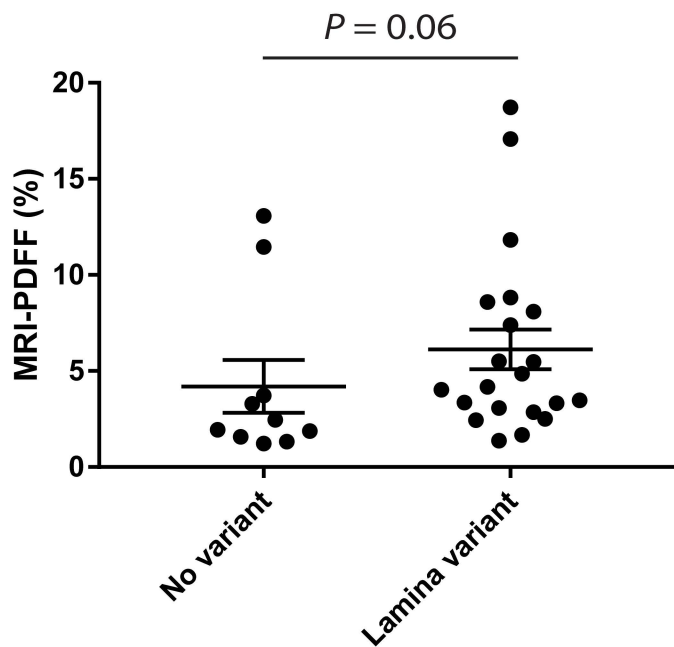

**Fig. S7.** Presence or absence of lamina-related genetic variants stratified by *PNPLA3* genotype.

(A) All twin and sibling pairs (37 pairs, n=74 subjects). *Left panel:* Scatter plot of liver fat content (assessed by MRI-PDFF) of the 40 subjects with *PNPLA3* CC genotype without and with a lamina-related genetic variant. *Right panel:* Scatter plot of liver fat content (assessed by MRI-PDFF) of the 34 subjects with *PNPLA3* CG or GG genotype without and with a lamina-related genetic variant. Error bars represent standard error of the mean; Mann-Whitney U test was used to assess statistical significance at a threshold of  $P < 0.05$ . (B) Twin pairs only (31 pairs, n=62 subjects). *Left panel:* Scatter plot of liver fat content (assessed by MRI-PDFF) of the 31 twins with *PNPLA3* CC genotype without and with a lamina-related genetic variant. *Right panel:* Scatter plot of liver fat content (assessed by MRI-PDFF) of the 31 twins with *PNPLA3* CG or GG genotype without and with a lamina-related genetic variant. Error bars represent standard error of the mean; Mann-Whitney U test was used to assess statistical significance at a threshold of  $P < 0.05$ . Note that subjects with *PNPLA3* CG and GG genotypes were grouped for these analyses due to the small number of GG homozygotes (n=12) in the cohort.

## Fig S8

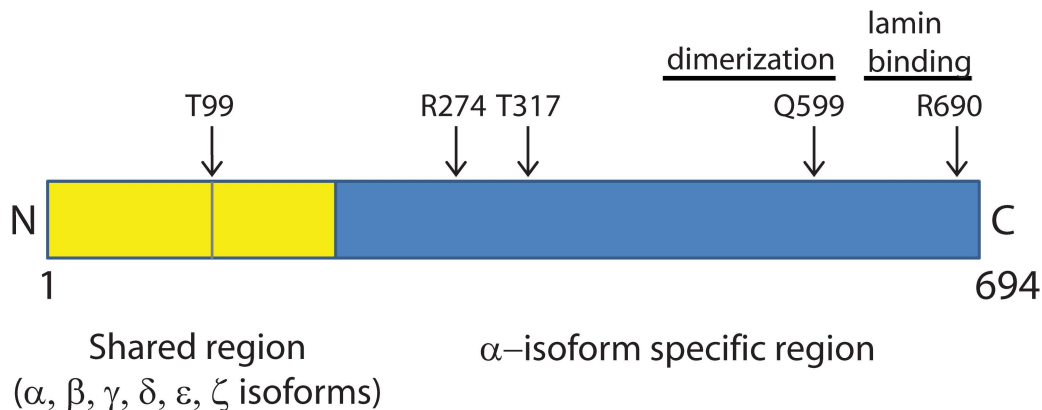

**Fig. S8.** Schematic of the LAP2 $\alpha$  protein. The *TMPO* gene encodes six isoforms of LAP2, which are derived via alternative splicing. As shown, four of the five genetic variants in *TMPO* identified in this study were in the portion of the gene unique to the  $\alpha$  isoform (blue shading), which is known to interact with lamin A. The fifth variant (within the yellow shading) was a single basepair insertion causing a frameshift and premature stop codon after Thr 99 in the translated protein.

**Fig S9**

**A**

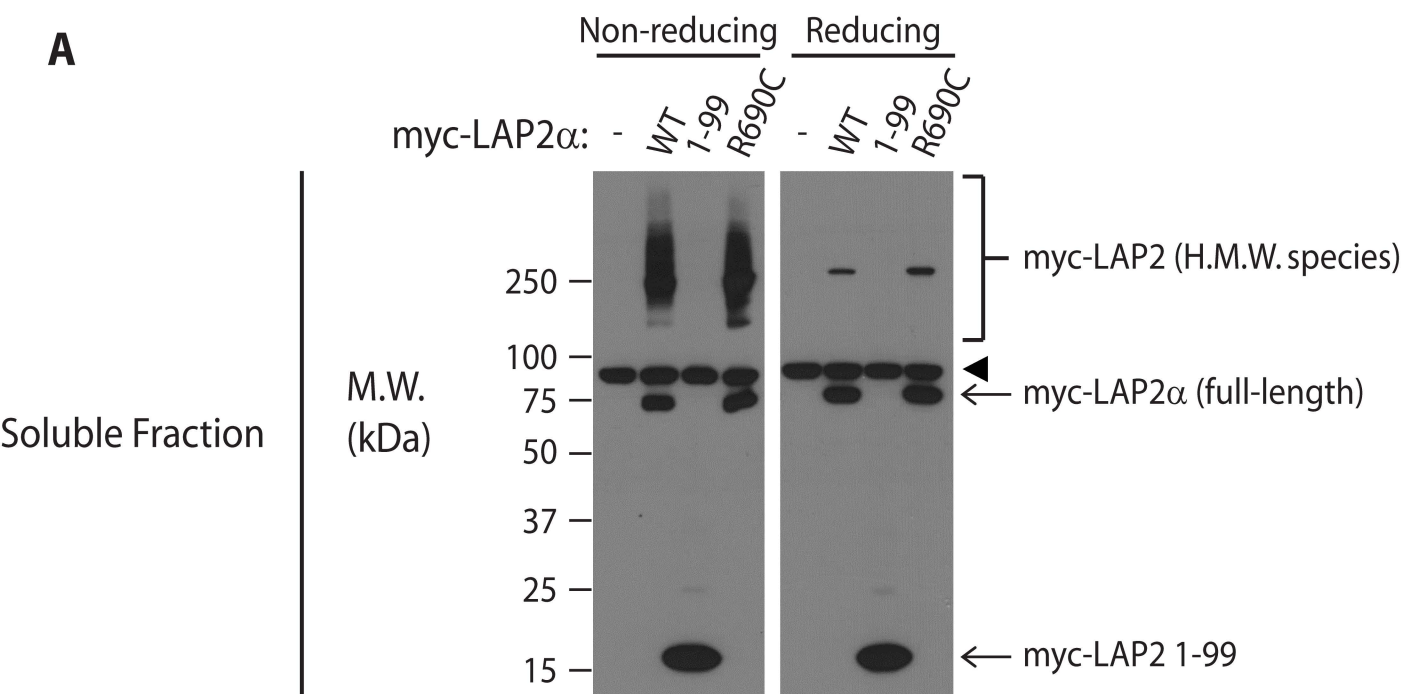

**B**

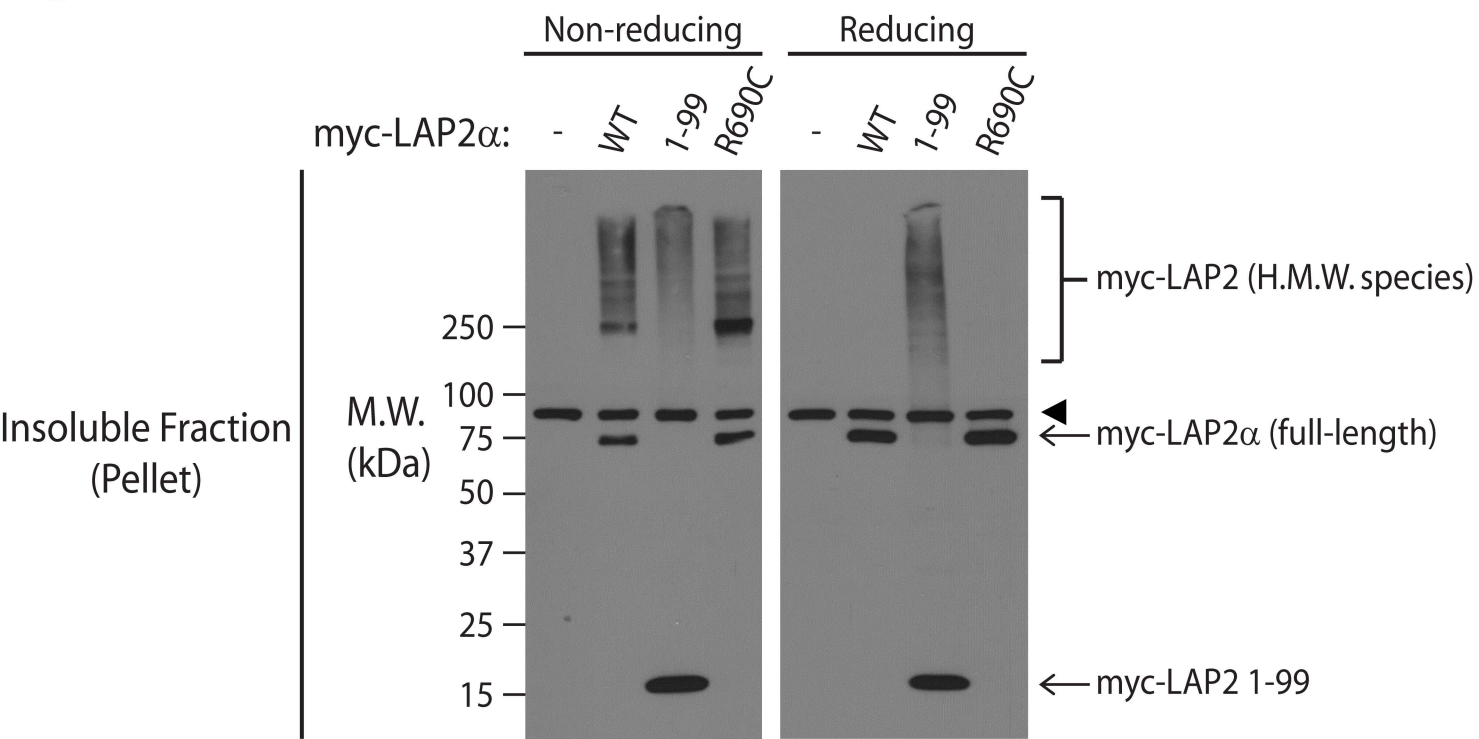

**Fig. S9.** Full-length, but not truncated, LAP2 $\alpha$  forms a soluble high-molecular weight species under non-reducing conditions. (A) Huh7 cells were transfected with wild-type (WT) LAP2 $\alpha$  or the indicated variant. Two days after transfection, cells were harvested and the Triton-soluble fraction was resolved on denaturing SDS-PAGE under non-reducing or reducing conditions. Transfected LAP2 was visualized by immunoblotting with antibody directed to the myc tag. (B) The Triton-insoluble (pellet) fraction of Huh7 cells, transfected as in panel A, was resolved using denaturing SDS-PAGE (non-reducing and reducing) and analyzed by immunoblotting. H.M.W., high molecular weight; M.W., apparent molecular weight; kDa, kilodaltons. Arrowhead highlights a non-specific band recognized by the myc antibody.

**Fig S10**

**A**

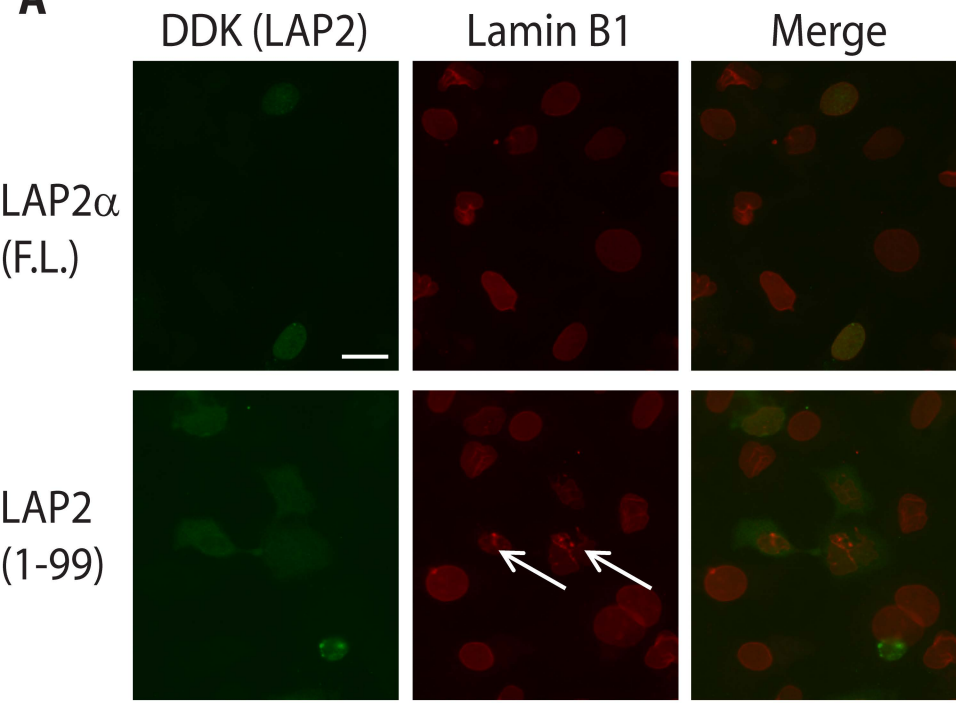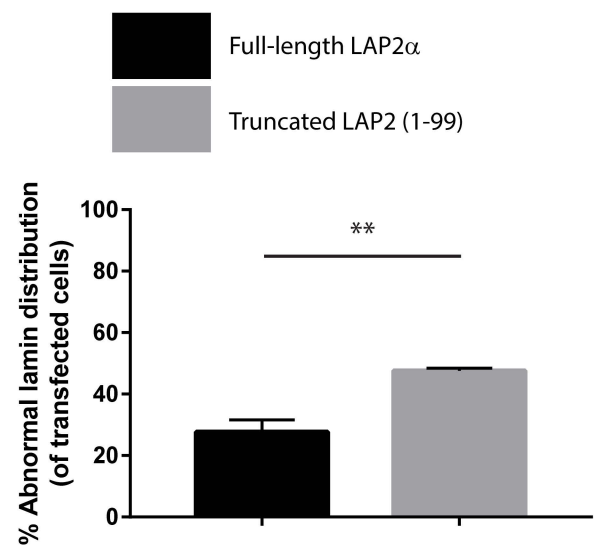

**B**

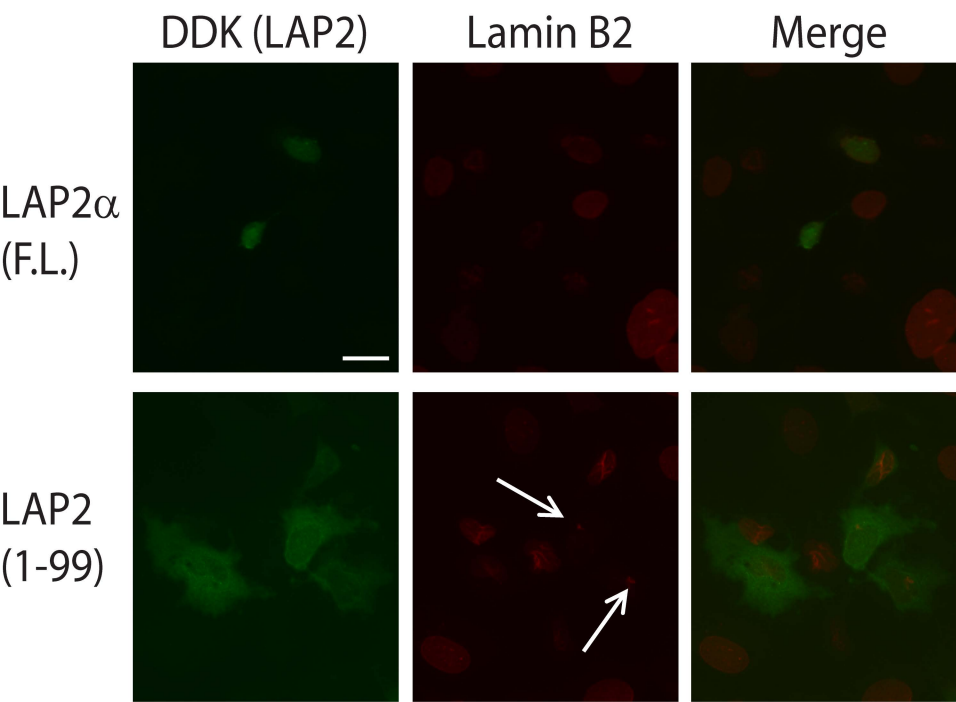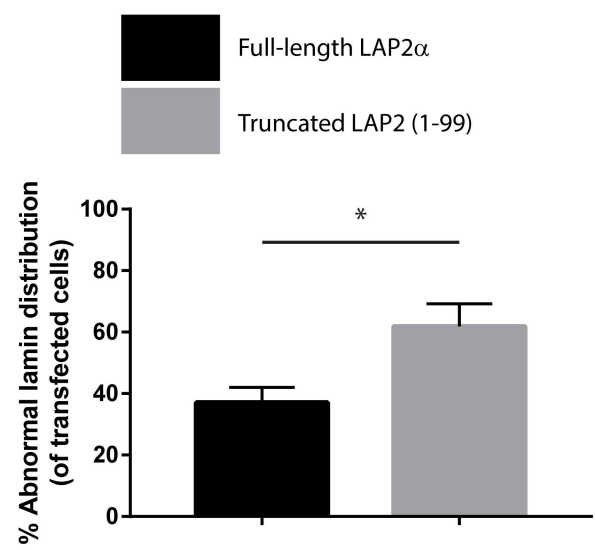



**Fig. S10.** Truncated LAP2 alters B-type lamin distribution. (A) Huh7 cells were transfected with DDK-tagged full-length (F.L.) LAP2 $\alpha$  or truncated LAP2 (1-99). After fixation, transfected LAP2 and endogenous lamin B1 were visualized by immunofluorescence using anti-FLAG and anti-lamin B1 antibodies, respectively. Representative high-magnification images are shown; nuclei of transfected cells with abnormal lamin staining (punctate/globular) are indicated by arrows. Scale bar, 20  $\mu$ m. Right panel shows quantitation (>40 nuclei scored for each condition). Error bars represent standard error of the mean. Student's *t* test was used to determine statistical significance; \*\*,  $P < 0.01$ . (B) Cells were transfected with full-length or truncated LAP2 $\alpha$  with DDK tag as in panel A. After fixation, transfected LAP2 and endogenous lamin B2 were visualized by immunofluorescence using anti-FLAG and anti-lamin B2 antibodies, respectively. Representative high-magnification images are shown; nuclei of transfected cells with abnormal lamin staining (punctate/globular) are indicated by arrows. Scale bar, 20  $\mu$ m. Right panel shows quantitation (>40 nuclei scored for each condition). Error bars represent standard error of the mean. Student's *t* test was used to determine statistical significance; \*,  $P < 0.05$ .

| <b>Primer Name</b> | <b>Variant</b>                       | <b>Sequence (5' → 3')</b>   |
|--------------------|--------------------------------------|-----------------------------|
| ZMPSTE24-L438F-FWD | <i>ZMPSTE24</i> L438F                | TTTCTGGCCTGTTTGCTTGG        |
| ZMPSTE24-L438F-REV | <i>ZMPSTE24</i> L438F                | CATGCTGCCAGGACAGAAAT        |
| BANF1-G21E-FWD     | <i>BANF1</i> G21E                    | GGGAAGAGTCTCCCTGGAAC        |
| BANF1-G21E-REV     | <i>BANF1</i> G21E                    | TGCCATTGAGGACACACAAG        |
| TMPO-T99fs-FWD     | <i>TMPO</i> T99fs                    | AGTACTTGCTTGGCTGTGC         |
| TMPO-T99fs-REV     | <i>TMPO</i> T99fs                    | GTCCTTGGAACTAAACTGCT        |
| TMPO-R274K-FWD     | <i>TMPO</i> R274K; <i>TMPO</i> T317S | TCTTGTTGCCACAACTTGC         |
| TMPO-R274K-REV     | <i>TMPO</i> R274K; <i>TMPO</i> T317S | CCAGTGGGGGCATAGAGTTA        |
| TMPO-Q599E-FWD     | <i>TMPO</i> Q599E                    | TGGCATGCAAATATCCAGTTTC      |
| TMPO-Q599E-REV     | <i>TMPO</i> Q599E                    | AATCCTTCAGCCAGAGGTATCG      |
| TMPO-R690C-FWD     | <i>TMPO</i> R690C                    | CGCTTGGGATTCTGAGCAA         |
| TMPO-R690C-REV     | <i>TMPO</i> R690C                    | ATTGTTTGTACCAGGCTTCCT       |
| SREBF1-V610M-FWD   | <i>SREBF1</i> V610M                  | GGGACAGATTCATGGTGTGCACAGG   |
| SREBF1-V610M-REV   | <i>SREBF1</i> V610M                  | GAACCTGGGGCTCTGGATTCCTGG    |
| SREBF2-S72ins-FWD  | <i>SREBF2</i> S72ins                 | GAAAGAGGTAAGGGTTTCCTGACCC   |
| SREBF2-S72ins-REV  | <i>SREBF2</i> S72ins                 | CTTGACTTGCAGAGTTGGAGCCTGTG  |
| SREBF2-R371K-FWD   | <i>SREBF2</i> R371K                  | TAACCTCTCCGAGTGGCAC         |
| SREBF2-R371K-REV   | <i>SREBF2</i> R371K                  | CCACCTCATTGTCCACCAGA        |
| SREBF2-G595A-FWD   | <i>SREBF2</i> G595A                  | GGAAATACCTCAGAATGTCAGCAGGG  |
| SREBF2-G595A-REV   | <i>SREBF2</i> G595A                  | GCTGGTCTTAGCTTCGTCTTCAAAGC  |
| SREBF2-R860S-FWD   | <i>SREBF2</i> R860S                  | GGTCTTAGAGCTGGAGAGCTGAACAG  |
| SREBF2-R860S-REV   | <i>SREBF2</i> R860S                  | GAACCTGGAGCCACAGGTATGAACCTG |
| SREBF2-R1080Q-FWD  | <i>SREBF2</i> R1080Q                 | CTTTCCGTGGATTGGGTGG         |
| SREBF2-R1080Q-REV  | <i>SREBF2</i> R1080Q                 | CCACTCTCAGCGGGAAGAT         |

**Table S1.** Primers used for PCR amplification of genomic DNA and Sanger sequencing.

| <b>Antibody target</b> | <b>Manufacturer</b>      | <b>Catalog/clone number</b> | <b>Dilution</b>                            |
|------------------------|--------------------------|-----------------------------|--------------------------------------------|
| FLAG / DDK tag         | Sigma-Aldrich            | F1804 (clone M2)            | 1:250 (IF)                                 |
| GFP                    | Origene                  | TA150041 (clone 2H8)        | 1:2000 (IB); 1.5 µg per 500 µL lysate (IP) |
| Myc tag                | Abcam                    | ab9106                      | 1:1000 (IB)                                |
| Lamin A/C              | Santa Cruz Biotechnology | sc-20681 (H-110)            | 1:250 (IF)                                 |
| Lamin B1               | Abcam                    | ab16048                     | 1:250 (IF)                                 |
| Lamin B2               | Cell Signaling           | 12255 (clone D8P3U)         | 1:250 (IF)                                 |
| p62/SQSTM1             | Abcam                    | ab96706                     | 1:2000 (IB)                                |

**Table S2.** Antibodies used for immunofluorescence (IF), immunoprecipitation (IP), and immunoblotting (IB).

| <b>Gene</b>     | <b>Protein</b>          | <b>Associated disease(s)</b>                                                                           |
|-----------------|-------------------------|--------------------------------------------------------------------------------------------------------|
| <i>LMNA</i>     | A-type lamin            | Dilated cardiomyopathy, progeria, lipodystrophy, Charcot-Marie-Tooth disease, muscular dystrophy (1-9) |
| <i>LMNB2</i>    | B-type lamin            | Lipodystrophy (10)                                                                                     |
| <i>ZMPSTE24</i> | Lamin-processing enzyme | Mandibuloacral dysplasia, lipodystrophy, restrictive dermopathy (11, 12)                               |
| <i>ICMT</i>     | Lamin-processing enzyme | None known                                                                                             |
| <i>FNTA</i>     | Lamin-processing enzyme | None known                                                                                             |
| <i>FNTB</i>     | Lamin-processing enzyme | None known                                                                                             |
| <i>TMPO</i>     | Lamin binding partner   | Dilated cardiomyopathy (13)                                                                            |
| <i>BANF1</i>    | Lamin binding partner   | Atypical progeria (14)                                                                                 |
| <i>SREBF1</i>   | Transcription factor    | None known                                                                                             |
| <i>SREBF2</i>   | Transcription factor    | None known                                                                                             |

**Table S3.** Candidate genes sequenced.

**Table S4.** LAP2 interacting proteins as determined by mass spectrometry (appended separately).

| TWIN ID | Sex | Age (yrs) | NAFLD | Diabetes | Other chronic disease | <i>PNPLA3</i> genotype | Height (m) | Weight (kg) | BMI (kg/m <sup>2</sup> ) | Alcohol use                    | ALT (IU/L) | Glucose (mg/dL) | Insulin (μU/mL) | HOMA-IR | TG (mg/dL) |
|---------|-----|-----------|-------|----------|-----------------------|------------------------|------------|-------------|--------------------------|--------------------------------|------------|-----------------|-----------------|---------|------------|
| TW01    | M   | 41        | No    | No       | No                    | CG                     | 1.73       | 83.9        | 28                       | None                           | 26         | 92              | 8               | 1.8     | 79         |
| TW02    | M   | 41        | Yes   | No       | No                    | CG                     | 1.74       | 100.6       | 33                       | Rare (less than once per week) | 26         | 90              | 14              | 3.1     | 172        |

**Table S5.** Clinical and laboratory data for monozygotic twins TW01 and TW02 carrying insertion in *TMPO*. U, units; IU, international units; HOMA-IR, homeostatic model of insulin resistance; TG, triglycerides.

## Supplementary Methods

***Study participant recruitment and clinical data acquisition.*** All participants (recruited between January 2012 and January 2015) underwent a standardized clinical research visit at the University of California San Diego (UCSD) NAFLD Translational Research Unit including detailed medical history, assessment of alcohol consumption, physical examination, testing to exclude other causes of chronic liver disease, fasting laboratory tests (see below), and magnetic resonance imaging (MRI) examination of the liver. Research visits and MRI procedures for each related pair were performed on the same day. The Alcohol Use Disorders Identification Test questionnaire and Skinner Lifetime Drinking history were administered to record and quantify alcohol use. A physical examination including vital signs, height, weight, and anthropometric measurements was performed. Body mass index (BMI) was calculated by dividing body weight by the square of the height (kilogram/meters<sup>2</sup>). Fasting laboratory studies were obtained for all participants including complete blood count, liver disease screening tests (hepatitis B surface antigen, hepatitis C antibody, and iron panel including serum ferritin), clinical chemistry (creatinine, total protein, blood urea nitrogen, uric acid), hemoglobin A1c, hepatic panel (total bilirubin, direct bilirubin, aspartate aminotransferase, alanine aminotransferase [ALT], alkaline phosphatase,  $\gamma$ -glutamyltransferase, albumin, prothrombin time, and international normalized ratio), lipid profile, and glucose/insulin levels. MRI examinations were performed using a 3T research scanner (GE Signa EXCITE HDxt; GE Healthcare, Waukesha, WI) at the UCSD MR3T Research Laboratory. Liver fat was measured via MRI-determined proton-density fat-fraction (MRI-PDFF), and liver fibrosis was quantified by MR elastography-determined stiffness (MRE-stiffness) as described (15). NAFLD was defined as MRI-PDFF  $\geq$ 5%

without apparent secondary cause of hepatic steatosis such as significant alcohol use, use of steatogenic medication(s), or other cause of liver disease.

***Next-generation DNA sequencing and variant identification:*** Next-generation sequence data was obtained from genomic DNA by amplification of target regions with a custom Illumina TruSeq amplicon panel and analysis via Illumina MiSeq instrument. Sequences were then trimmed using Trimmomatic v0.32 and aligned to human reference genome build Grc37/hg19 using the Burrows-Wheeler Aligner 'mem' algorithm v0.7.8. Variants were detected using the Broad Institute Genome Analysis Toolkit v.3.3-0 Haplotype Caller with default parameters, -strand\_emit\_conf 10 and -strand\_call\_conf 30, DISCOVERY mode. Variant filtering, annotation and reporting were performed using VarSeq v.1.1.0 (Golden Helix, Bozeman, MT). Variants with fewer than 5 alternate observations were removed. Variants were annotated based on RefSeq v.69 gene models, and matched with 1000 Genomes Phase 3 population frequency data and dbNSFP v2.0 functional annotations (16, 17).



## Supplementary References

1. Worman HJ, Fong LG, Muchir A, Young SG. Laminopathies and the long strange trip from basic cell biology to therapy. *J Clin Invest* 2009;119:1825-1836.
2. Davidson PM, Lammerding J. Broken nuclei--lamins, nuclear mechanics, and disease. *Trends Cell Biol* 2014;24:247-256.
3. Hatch E, Hetzer M. Breaching the nuclear envelope in development and disease. *J Cell Biol* 2014;205:133-141.
4. Taylor MR, Fain PR, Sinagra G, Robinson ML, Robertson AD, Carniel E, Di Lenarda A, et al. Natural history of dilated cardiomyopathy due to lamin A/C gene mutations. *J Am Coll Cardiol* 2003;41:771-780.
5. **Van Esch H, Agarwal AK**, Debeer P, Fryns JP, Garg A. A homozygous mutation in the lamin A/C gene associated with a novel syndrome of arthropathy, tendinous calcinosis, and progeroid features. *J Clin Endocrinol Metab* 2006;91:517-521.
6. Guenantin AC, Briand N, Bidault G, Afonso P, Bereziat V, Vatier C, Lascols O, et al. Nuclear envelope-related lipodystrophies. *Semin Cell Dev Biol* 2014;29:148-157.
7. Bonne G, Di Barletta MR, Varnous S, Becane HM, Hammouda EH, Merlini L, Muntoni F, et al. Mutations in the gene encoding lamin A/C cause autosomal dominant Emery-Dreifuss muscular dystrophy. *Nat Genet* 1999;21:285-288.
8. Fatkin D, MacRae C, Sasaki T, Wolff MR, Porcu M, Frenneaux M, Atherton J, et al. Missense mutations in the rod domain of the lamin A/C gene as causes of dilated cardiomyopathy and conduction-system disease. *N Engl J Med* 1999;341:1715-1724.

9. Ajluni N, Meral R, Neidert AH, Brady GF, Buras E, McKenna B, DiPaola F, et al. Spectrum of disease associated with partial lipodystrophy: lessons from a trial cohort. *Clin Endocrinol (Oxf)* 2017;86:698-707.
10. Hegele RA, Cao H, Liu DM, Costain GA, Charlton-Menys V, Rodger NW, Durrington PN. Sequencing of the reannotated LMNB2 gene reveals novel mutations in patients with acquired partial lipodystrophy. *Am J Hum Genet* 2006;79:383-389.
11. Agarwal AK, Fryns JP, Auchus RJ, Garg A. Zinc metalloproteinase, ZMPSTE24, is mutated in mandibuloacral dysplasia. *Hum Mol Genet* 2003;12:1995-2001.
12. Navarro CL, De Sandre-Giovannoli A, Bernard R, Boccaccio I, Boyer A, Genevieve D, Hadj-Rabia S, et al. Lamin A and ZMPSTE24 (FACE-1) defects cause nuclear disorganization and identify restrictive dermopathy as a lethal neonatal laminopathy. *Hum Mol Genet* 2004;13:2493-2503.
13. Taylor MR, Slavov D, Gajewski A, Vlcek S, Ku L, Fain PR, Carniel E, et al. Thymopoietin (lamina-associated polypeptide 2) gene mutation associated with dilated cardiomyopathy. *Hum Mutat* 2005;26:566-574.
14. Puente XS, Quesada V, Osorio FG, Cabanillas R, Cadinanos J, Fraile JM, Ordonez GR, et al. Exome sequencing and functional analysis identifies BANF1 mutation as the cause of a hereditary progeroid syndrome. *Am J Hum Genet* 2011;88:650-656.
15. Loomba R, Schork N, Chen CH, Bettencourt R, Bhatt A, Ang B, Nguyen P, et al. Heritability of Hepatic Fibrosis and Steatosis Based on a Prospective Twin Study. *Gastroenterology* 2015;149:1784-1793.
16. 1000 Genomes Project Consortium (Auton A, Brooks LD, Durbin RM, Garrison EP, Kang HM, Korbel JO, et al.). A global reference for human genetic variation. *Nature* 2015;526:68-74.

17. Liu X, Jian X, Boerwinkle E. dbNSFP v2.0: a database of human non-synonymous SNVs and their functional predictions and annotations. *Hum Mutat* 2013;34:E2393-2402.
